# Supplementary material for: The deoxydehydration (DODH) reaction: a versatile technology for accessing olefins from bio-based polyols
Source: Royal Society of Chemistry journal article supplement (doi:10.1039/d0gc00689k), 2020-01-01
Supplement: d0gc00689k1.xlsx [file d0gc00689k1.xlsx]

## Sheet: E-factor calculation
	Entry	Bio-based polyol	Mole Bio-based polyol	MM (g/mole) Bio-based polyol	Mass (g)	Reagents & solvents	Molarity of Bio-based polyol in solvent	Density of solvent (g/mL)	Reagents & solvents equivalents	MM (g/mole) Reagents & solvents	Mass (g) Reagents & solvents	DODH product(s)	Product(s) yield (%)	Mole product(s)	MM (g/mole) product(s)	Mass (g) product(s)	E-Factor	Ref.
	1		1	92.09	92.09	Formic acid			1.44	46.03	66.2832		80	0.8	58.08	46.464	1.72249	24 E. Arceo, P. Marsden, R. G. Bergman and J. A. Ellman, Chem. Commun., 2009, 0, 3357.
													13.6	0.136	86.09	11.7082
	2		1	92.09	92.09	Formic acid			1.8	46.03	82.854		99	0.99	58.08	57.4992	2.04255	26 X. Li and Y. Zhang, ACS Catal., 2016, 6, 143–150.
	3		1	92.09	92.09	Formic acid			2.5	46.03	115.075		56	0.56	58.08	32.5248	4.49652	28 N. N. Tshibalonza and J.-C. M. Monbaliu, Green Chem., 2017, 19, 3006–3013.
													6	0.06	86.09	5.1654
	4		1	92.09	92.09	Triethyl orthoformate			1	148.2	148.2		72	0.72	58.08	41.8176	0.70022	52 G. Crank and F. W. Eastwood, Aust. J. Chem., 1964, 17, 1392–1398.
														2.16	46.07	99.5112
	5		1	92.09	92.09	Triethyl orthoformate			1	148.2	148.2		84	0.84	58.08	48.7872	0.445909	28 N. N. Tshibalonza and J.-C. M. Monbaliu, Green Chem., 2017, 19, 3006–3013.
						Formic acid			0.1	46.03	4.603		2	0.02	86.09	1.7218
														2.58	46.07	118.861
	6		1	92.09	92.09	Cp*ReO3			0.01	369.43	3.6943		67	0.67	58.08	38.9136	444.887	86 G. K. Cook and M. A. Andrews, J. Am. Chem. Soc., 1996, 118, 9448–9449.
						PPh3			0.68	262.29	178.357
						Chlorobenzene (1 mL for 65 µmol of polyol)		1.11	151.714	112.56	17076.9
	7		1	92.09	92.09	NaReO4			0.1	273.19	27.319		15	0.15	58.08	8.712	34.4074	89 I. Ahmad, G. Chapman and K. M. Nicholas, Organometallics, 2011, 30, 2810–2818.
						Na2SO3			1.5	126.04	189.06
	8		1	92.09	92.09	MTO			0.02	249.24	4.9848		27	0.27	58.08	15.6816	3.54291	96 J. Yi, S. Liu and M. M. Abu-Omar, ChemSusChem, 2012, 5, 1401–1404.
													6	0.06	56.06	3.3636
													4	0.04	58.08	2.3232
	9		1	92.09	92.09	MTO			0.025	249.24	6.231		90	0.9	58.08	52.272	53.3182	99 M. Shiramizu and F. D. Toste, Angew. Chemie - Int. Ed., 2012, 51, 8082–8086.
						3-octanol	0.3	0.8223	21.0474	130.23	2741
	10		1	92.09	92.09	MTO			0.02	249.24	4.9848		87	0.87	58.08	50.5296	17.1263	109 V. Canale, L. Tonucci, M. Bressan and N. D’Alessandro, Catal. Sci. Technol., 2014, 4, 3697–3704.
						2,4-Dimethyl-3- pentanol	1	0.829	7.13425	116.2	829		1	0.01	56.06	0.5606
	11		1	92.09	92.09	ReO3			0.02	234.2	4.684		91	0.91	58.08	52.8528	16.4975	109 V. Canale, L. Tonucci, M. Bressan and N. D’Alessandro, Catal. Sci. Technol., 2014, 4, 3697–3704.
						2,4-Dimethyl-3- pentanol	1	0.829	7.13425	116.2	829		0.1	0.001	56.06	0.05606
	12		1	92.09	92.09	MTO			0.025	249.24	6.231		47	0.47	58.08	27.2976	193.095	113 C. Boucher-Jacobs and K. M. Nicholas, ChemSusChem, 2013, 6, 597–599.
						Benzyl alcohol	0.2	1.04	48.0858	108.14	5200
	13		1	92.09	92.09	MTO			0.1	249.24	24.924		80	0.8	58.08	46.464	62.1622	115 C. Boucher-Jacobs and K. M. Nicholas, Organometallics, 2015, 34, 1985–1990.
						Indoline			1.1	119.17	131.087
						1-Butanol	0.3	0.806	36.2475	74.12	2686.67
	14		1	92.09	92.09	CptttReO3			0.02	467.62	9.3524		91	0.91	58.08	52.8528	216.396	117 S. Raju, J. T. B. H. Jastrzebski, M. Lutz and R. J. M. Klein Gebbink, ChemSusChem, 2013, 6, 1673–1680.
						PPh3			1.1	262.29	288.519
						Chlorobenzene	0.1	1.11	98.6141	112.56	11100
	15		1	92.09	92.09	CpttReO3			0.02	411.52	8.2304		99	0.99	58.08	57.4992	143.755	120 J. Li, M. Lutz, M. Otte and R. J. M. Klein Gebbink, ChemCatChem, 2018, 10, 4755–4760.
						3-octanol	0.1	0.8223	63.1421	130.23	8223
	16		1	92.09	92.09	AHM			0.0032	1235.99	3.95517		9	0.09	58.08	5.2272	17.3741	145 J. R. Dethlefsen, D. Lupp, B. C. Oh and P. Fristrup, ChemSusChem, 2014, 7, 425–428.
	17		1	92.09	92.09	NH4VO3			0.01	116.98	1.1698		22	0.22	58.08	12.7776	5.25489	162 A. R. Petersen, L. B. Nielsen, J. R. Dethlefsen and P. Fristrup, ChemCatChem, 2018, 10, 769–778.
													3.7	0.037	56.06	2.07422
													0.1	0.001	58.08	0.05808
	18		1	92.09	92.09	ReOx/Al2O3 (100 mg for 1 mmol of polyol) divided by 3 for the 3 cycles					33.3333		92	0.92	58.08	53.4336	51.3856	125 Y. Kon, M. Araque, T. Nakashima, S. Paul, F. Dumeignil and B. Katryniok, ChemistrySelect, 2017, 2, 9864–9868.
						2-hexanol	0.303	0.81014	26.1669	102.18	2673.73
	19		1	92.09	92.09	ReOxNPs (1 wt%)					0.9209		76	0.76	58.08	44.1408	30.0387	126 J. H. Jang, H. Sohn, J. Camacho-Bunquin, D. Yang, C. Y. Park, M. Delferro and M. M. Abu-Omar, ACS Sustain. Chem. Eng., 2019, 7, 11438–11447.
						3-octanol			10	130.23	1302.3		1.4	0.014	58.08	0.81312
	20		1	92.09	92.09	Pt-Re BNN (5 mg for 2,6 mmol of polyol					1.92308		47	0.47	58.08	27.2976	48.7879	127 S. Nijem, S. Dery, M. Carmiel, G. Horesh, J. Garrevoet, K. Spiers, G. Falkenberg, C. Marini and E. Gross, J. Phys. Chem. C, 2018, 122, 24801–24808.
						3-octanol	0.65	0.8223	9.71417	130.23	1265.08
	21		1	92.09	92.09	ReOx-impAu/CeO2 (0.3 g for 0.5 g of polyol					153.483		91	0.91	58.08	52.8528	16.4046	129 S. Tazawa, N. Ota, M. Tamura, Y. Nakagawa, K. Okumura and K. Tomishige, ACS Catal., 2016, 6, 6393–6397.
						1,4-dioxane (4 g for 0.5 g of polyol)			8.36137	88.11	736.72		5	0.05	60.1	3.005
													1	0.01	58.08	0.5808
	22		1	92.09	92.09	Nb-Si-V (50 mg for 20 ml of glycerol)					0.182718		5.6	0.056	58.08	3.25248	14.7533	165 H. S. Oliveira, P. P. Souza and L. C. A. Oliveira, Catal. Today, 2017, 289, 258–263.
						H2O2			0.155	34.01	5.27155		2.4	0.024	74.08	1.77792
													2	0.02	58.08	1.1616
	23		1	122.12	122.12	Formic acid			2	46.03	92.06		39	0.39	70.09	27.3351	6.83535	24 E. Arceo, P. Marsden, R. G. Bergman and J. A. Ellman, Chem. Commun., 2009, 0, 3357.
	24		1	122.12	122.12	p-Toluenesulfonyl chloride			4.4	190.64	838.816		84.63	0.8463	54.09	45.7764	333.402	29 R. S. Tipson and L. H. Crectcher, J. Org. Chem., 1943, 08, 95–98.
						Pyridine			30.78	79.1	2434.7
						NaI			7.4	149.89	1109.19
						Acetone			186	58.08	10802.9
	25		1	122.12	122.12	Triethyl orthoformate			1	148.2	148.2		56	0.56	88.11	49.3416	3.5095	60 N. N. Tshibalonza, R. Gérardy, Z. Alsafra, G. Eppe and J. C. M. Monbaliu, Green Chem., 2018, 20, 5147–5157.
						Formic acid			0.1	46.03	4.603		8	0.08	88.11	7.0488
						DMSO	2.4	1.1	5.86629	78.13	458.333		9	0.09	54.09	4.8681
													0.1	0.001	70.09	0.07009
													0.1	0.001	104.1	0.1041
														2.196	46.07	101.17
	26		1	122.12	122.12	Triethyl orthoformate			2	148.2	296.4		35	0.35	70.09	24.5315	4.29767	60 N. N. Tshibalonza, R. Gérardy, Z. Alsafra, G. Eppe and J. C. M. Monbaliu, Green Chem., 2018, 20, 5147–5157.
						Formic acid			0.1	46.03	4.603		26	0.26	54.09	14.0634
						[EMIM][ES]	3.1	1.24	1.69284	236.29	400		12	0.12	70.09	8.4108
													3	0.03	104.1	3.123
													0.1	0.001	68.08	0.06808
														2.283	46.07	105.178
	27		1	122.12	122.12	Cp*ReO3			0.015	369.43	5.54145		49.8	0.498	54.09	26.9368	783.265	86 G. K. Cook and M. A. Andrews, J. Am. Chem. Soc., 1996, 118, 9448–9449.
						PPh3			1	262.29	262.29		5.5	0.055	88.11	4.84605
						Chlorobenzene (1 mL for 44 µmol of polyol)		1.11	224.123	112.56	25227.3		1	0.01	88.11	0.8811
	28		1	122.12	122.12	Bu4NReO4			0.1	492.67	49.267		27	0.27	54.09	14.6043	239.236	89 I. Ahmad, G. Chapman and K. M. Nicholas, Organometallics, 2011, 30, 2810–2818.
						Na2SO3			1.5	126.04	189.06		6	0.06	70.09	4.2054
						Benzene (2,5 mL for 0,5 mmol of polyol)		0.874	55.9467	78.11	4370		1	0.01	88.11	0.8811
	29		1	122.12	122.12	Re2(CO)10			0.0125	652.51	8.15638		62	0.62	70.09	43.4558	20.9454	95 E. Arceo, J. A. Ellman and R. G. Bergman, J. Am. Chem. Soc., 2010, 132, 11408–11409.
						PTSA			0.017	172.2	2.9274
						3-octanol			6.3	130.23	820.449
	30		1	122.12	122.12	MTO			0.02	249.24	4.9848		45	0.45	70.09	31.5405	6.41423	96 J. Yi, S. Liu and M. M. Abu-Omar, ChemSusChem, 2012, 5, 1401–1404.
						1-Heptanol			1.5	116.2	174.3		13	0.13	70.09	9.1117
	31		1	122.12	122.12	MTO			0.025	249.24	6.231		89	0.89	54.09	48.1401	50.376	99 M. Shiramizu and F. D. Toste, Angew. Chemie - Int. Ed., 2012, 51, 8082–8086.
						3-octanol	0.3	0.8223	21.0474	130.23	2741		11	0.11	70.09	7.7099
	32		1	122.12	122.12	MTO			0.1	249.24	24.924		43	0.43	54.09	23.2587	132.107	115 C. Boucher-Jacobs and K. M. Nicholas, Organometallics, 2015, 34, 1985–1990.
						Indoline			2.2	119.17	262.174
						1-Butanol	0.3	0.806	36.2475	74.12	2686.67
	33		1	122.12	122.12	CptttReO3			0.02	467.62	9.3524		30	0.3	54.09	16.227	386.537	117 S. Raju, J. T. B. H. Jastrzebski, M. Lutz and R. J. M. Klein Gebbink, ChemSusChem, 2013, 6, 1673–1680.
						PPh3			2.2	262.29	577.038		8	0.08	88.11	7.0488
						Pyridine	0.1	0.978	123.641	79.1	9780		4.3	0.043	88.11	3.78873
	34		1	122.12	122.12	CptttReO3			0.025	467.62	11.6905		67	0.67	54.09	36.2403	68.8675	117 S. Raju, J. T. B. H. Jastrzebski, M. Lutz and R. J. M. Klein Gebbink, ChemSusChem, 2013, 6, 1673–1680.
						3-octanol	0.3	0.8223	21.0474	130.23	2741		7	0.07	70.09	4.9063
	35		1	122.12	122.12	CpttReO3			0.02	411.52	8.2304		87	0.87	54.09	47.0583	159.751	120 J. Li, M. Lutz, M. Otte and R. J. M. Klein Gebbink, ChemCatChem, 2018, 10, 4755–4760.
						3-octanol	0.1	0.8223	63.1421	130.23	8223		7	0.07	70.09	4.9063
	36		1	122.12	122.12	(NH4)6Mo7O24·4H2O (AHM)			0.05	1235.99	61.7995		39	0.39	70.09	27.3351	77.1566	147 J. R. Dethlefsen, D. Lupp, A. Teshome, L. B. Nielsen and P. Fristrup, ACS Catal., 2015, 5, 3638–3647
						Isopropanol	0.4	0.781	32.4875	60.1	1952.5
	37		1	122.12	122.12	MoO2acac2			0.1	326.15	32.615		15	0.15	70.09	10.5135	335.01	153 M. Stalpaert and D. De Vos, ACS Sustain. Chem. Eng., 2018, 6, 12197–12204.
						2,2,6,6-tetramethyl- heptane-3,5-dione			0.4	184.28	73.712		3	0.03	54.09	1.6227
						PPh3			1.5	262.29	393.435
						Mesitylene	0.25	0.864	28.7545	120.19	3456
	38		1	122.12	122.12	ReOxNPs (1 wt%)					1.2212		34	0.34	54.09	18.3906	60.1945	126 J. H. Jang, H. Sohn, J. Camacho-Bunquin, D. Yang, C. Y. Park, M. Delferro and M. M. Abu-Omar, ACS Sustain. Chem. Eng., 2019, 7, 11438–11447.
						3-octanol			10	130.23	1302.3		7	0.07	70.09	4.9063
	39		1	122.12	122.12	ReOx-impAu/CeO2 (0.3 g for 0.5 g of polyol					203.533		81	0.81	54.09	43.8129	27.5747	129 S. Tazawa, N. Ota, M. Tamura, Y. Nakagawa, K. Okumura and K. Tomishige, ACS Catal., 2016, 6, 6393–6397.
						1,4-dioxane (4 g for 0.5 g of polyol)			11.088	88.11	976.96		2	0.02	56.11	1.1222
													1	0.01	56.11	0.5611
													0.1	0.001	90.12	0.09012
	40		1	152.15	152.15	Formic acid			12	46.03	552.36		62.9	0.629	112.13	70.5298	8.99665	27 R. Sun, M. Zheng, X. Li, J. Pang, A. Wang, X. Wang and T. Zhang, Green Chem., 2017, 19, 638–642.
						Tetraglyme			0.29	222.28	64.4612		7.6	0.076	84.12	6.39312
	41		1	152.15	152.15	MTO			0.025	249.24	6.231		61	0.61	154.25	94.0925	173.917	99 M. Shiramizu and F. D. Toste, Angew. Chemie - Int. Ed., 2012, 51, 8082–8086.
						3-pentanol	0.05	0.815	184.912	88.15	16300
	42		1	152.15	152.15	MTO			0.1	249.24	24.924		56	0.56	84.12	47.1072	65.3575	115 C. Boucher-Jacobs and K. M. Nicholas, Organometallics, 2015, 34, 1985–1990.
						Indoline			2.2	119.17	262.174
						1-Butanol	0.3	0.806	36.2475	74.12	2686.67
	43		1	152.15	152.15	CpttReO3			0.02	411.52	8.2304		46	0.46	196.33	90.3118	91.8271	120 J. Li, M. Lutz, M. Otte and R. J. M. Klein Gebbink, ChemCatChem, 2018, 10, 4755–4760.
						3-octanol	0.1	0.8223	63.1421	130.23	8223
	44		1	182.17	182.17	MTO			0.025	249.24	6.231		54	0.54	80.13	43.2702	380.057	99 M. Shiramizu and F. D. Toste, Angew. Chemie - Int. Ed., 2012, 51, 8082–8086.
						3-pentanol	0.05	0.815	184.912	88.15	16300
	45		1	182.17	182.17	CpttReO3			0.02	411.52	8.2304		35	0.35	80.13	28.0455	298.991	120 J. Li, M. Lutz, M. Otte and R. J. M. Klein Gebbink, ChemCatChem, 2018, 10, 4755–4760.
						3-octanol	0.1	0.8223	63.1421	130.23	8223
	46		1	210.14	210.14	HReO4			0.07	251.21	17.5847		71	0.71	254.33	180.574	89.5318	105 M. Shiramizu and F. D. Toste, Angew. Chemie - Int. Ed., 2013, 52, 12905–12909.
						1-Butanol	0.05	0.806	217.485	74.12	16120
	47		1	210.14	210.14	NH4ReO4			0.05	268.24			82	0.82	142.11	116.53	140.681	108 H. Zhang, X. Li, X. Su, E. L. Ang, Y. Zhang and H. Zhao, ChemCatChem, 2016, 8, 1500–1506.
						3-pentanol	0.05	0.815	184.912	88.15	16300		16	0.16	212.25	33.96
	48		1	210.14	210.14	MTO			0.1	249.24	24.924		57	0.57	254.33	144.968	20.9628	115 C. Boucher-Jacobs and K. M. Nicholas, Organometallics, 2015, 34, 1985–1990.
						Indoline			2.2	119.17	262.174
						1-Butanol	0.3	0.806	36.2475	74.12	2686.67
	49		1	180.16	180.16	MTO			0.025	249.24	6.231		9	0.09	94.11	8.4699	850.451	99 M. Shiramizu and F. D. Toste, Angew. Chemie - Int. Ed., 2012, 51, 8082–8086.
						3-pentanol	0.05	0.815	184.912	88.15	16300		16	0.16	68.08	10.8928
	50		1	180.16	180.16	CpttReO3			0.02	411.52	8.2304		5	0.05	94.11	4.7055	1245.52	120 J. Li, M. Lutz, M. Otte and R. J. M. Klein Gebbink, ChemCatChem, 2018, 10, 4755–4760.
						3-octanol	0.1	0.8223	63.1421	130.23	8223		3	0.03	68.08	2.0424
	51		1	180.16	180.16	MTO			0.025	249.24	6.231		9	0.09	94.11	8.4699	723.145	99 M. Shiramizu and F. D. Toste, Angew. Chemie - Int. Ed., 2012, 51, 8082–8086.
						3-pentanol	0.05	0.815	184.912	88.15	16300		21	0.21	68.08	14.2968
	52		1	180.16	180.16	CpttReO3			0.02	411.52	8.2304		27	0.27	94.11	25.4097	247.319	120 J. Li, M. Lutz, M. Otte and R. J. M. Klein Gebbink, ChemCatChem, 2018, 10, 4755–4760.
						3-pentanol	0.1	0.815	92.456	88.15	8150		12	0.12	68.08	8.1696
	53		1	192.17	192.17	Formic acid			4	46.03	184.12		92	0.92	122.12	112.35	13.5731	25 E. Arceo, J. A. Ellman and R. G. Bergman, ChemSusChem, 2010, 3, 811–813.
						Sulfolane	1	1.261	10.4935	120.17	1261
	54		1	174.15	174.15	Formic acid			4	46.03	184.12		89	0.89	122.12	108.687	13.8985	25 E. Arceo, J. A. Ellman and R. G. Bergman, ChemSusChem, 2010, 3, 811–813.
						Sulfolane	1	1.261	10.4935	120.17	1261

## Sheet: MM-density-Reactants-Solvents 
	Reactant/Reagent/solvent/product	Molar Mass (g/mole)	Density (g/mL) 25 °C	BP (°C) (atm)	MP (°C)	CAS
	[EMIM][ES]	236.29	1,24 (19.7 °C)			342573-75-5
	1-​Propene	42.08	0.5	-48		115-07-1
	1,2-propanediol	76.1	1.036	187		57-55-6
	1,3-Butadiene	54.09	0.6149	-4.5	-108,966	106-99-0
	1,4-Anhydro-Erythritol	104.1	1,27	160-165 (0,17 Torr)	173-174	4358-64-9
	1,4-dioxane	88.11	1.034	100-102		123-91-1
	1-Butanol	74.12	0.806	117.7		71-36-3
	1-Heptanol	116.2	0.82	175.8		111-70-6
	1-propanol	60.1	0.804	97		71-23-8
	2,2,6,6-tetramethylheptane-3,5-dione	184.28	0.883	72-73 (6 mmHg)		1118-71-4
	2,4-Dimethyl-3-pentanol	116.2	0.829	139-140		600-36-2
	2,5-Dihydrofurane	70.09	0,9265 (20 °C)	66.5		1708-29-8
	2-hexanol	102.18	0.81014	140		626-93-7
	3,4-Dihydroxy-1-butene	88.11	1,047	196,5		497-06-3
	3-Octanol	130.23	0.8223	174-176		589-98-0
	3-pentanol	88.15	0.815	116		584-02-1
	Acetone	58.08	0.784	56		67-64-1
	Acrolein	56.06	0.839	53		107-02-8
	Allyl alcohol	58.08	0.854	97	8.4	107-18-6
	Allyl formate	86.09	0,922±0,06( 20 °C)	83.6		1838-59-1
	Benzene	78.11	0.874	80.1		71-43-2
	Benzyl alcohol	108.14	1.04	205.3		100-51-6
	Butane-1,2-diol	90.121		194		584-03-2
	Butane-1,4-diol			235		110-63-4
	Butane-2,3-diol			183.55		513-85-9
	Chlorobenzene	112.56	1.11	132		108-90-7
	cis-2-Butene-1,4-diol	88.11	1,072 (20 °C)	235	4-10	6117-80-2
	Crotonaldehyde	70.09	0.846	101-102		4170-30-3
	D(-)-Quinic acid	192.17	1.35		168	77-95-2
	Dihydroxyacetone	90.08	1,28±0,06 (20 °C)	213,7±15,0	90	96-26-4
	DMSO	78.13	1.1	190.85	18.5	67-68-5
	E-2,4-pentadien -1-ol	84.12	0,864 g/ml (20 °C)	66-68 (26 Torr) 127,2±9,0		51042-92-3
	E-2,4-pentadien -1-ol-formate	112.13	0,934±0,06 calc (20 °C)	153,0±9,0		38650-92-9
	E-hexa-1,3,5-triene	80.13	0.737	76-79		2235-12-3
	Erythritol	122.12	1,45 (20 °C)	329-331 (1 bar)	121 (1 bar)	149-32-6
	Ethanol	46.07	0.78	79		64-17-5
	Formic acid	46.03	1.22	100.8		64-18-6
	Furane	68.07	0,936	31.36	-85,6	110-00-9
	Furane	68.08	0,9371 (19.4 °C)	31.36		110-00-9
	Glycerol	92.09	1,26	290	18.2	56-81-5
	H2O2	34.01	1.44	152		7722-84-1
	Hydroxyacetone	74.08	1.059	145.5		116-09-6
	Hydroxyacetone	74.08	1.059	145–146		116-09-6
	Indoline	119.17				496-15-1
	Isopropanol	60.1	0.781	82.5		67-63-0
	Mesitylene	120.19	0.864	163-166		108-67-8
	MoO2acac2	326.15			184	17524-05-9
	Mucic acid	210.14			220-225	526-99-8
	NaI	149.89				7681-82-5
	Propanal	58.08	0.8	48.8		123-38-6
	p-Toluenesulfonyl chloride	190.64				98-59-9
	PTSA	172.2				104-15-4
	Pyridine	79.1	0.978	115		110-86-1
	Shikimic Acid	174.15	1.725		185-187	138-59-0
	Sorbitol	182.17	1.49	296		50-70-4
	Sulfolane	120.17	1.261	285	27.4	126-33-0
	Tetraglyme	222.28	1.009	275-276		143-24-8
	trans-2-Butene-1,4-diol	88.11	1,0687 (20 °C)	131	25	821-11-4
	Triethyl orthoformate	148.2	0.891	146		122-51-0
	Xylitol	152.15	1.52	216	93.5	87-99-0
